# Supplementary material for: Numerical and Experimental Analyses of Three-Dimensional Unsteady Flow Around a Micro-Pillar Subjected to Rotational Vibration
Source: Preprints.org preprint supplement (doi:10.20944/preprints201811.0175.v1), 2018-11-07
Supplement: Supplementary file 1 [file supplementary]

# Supplementary Materials: Numerical and experimental analyses of three-dimensional unsteady flow around a micro-pillar subjected to rotational vibration

Kanji Kaneko, Takayuki Osawa, Yukinori Kametani, Takeshi Hayakawa, Yosuke Hasegawa, Hiroaki Suzuki

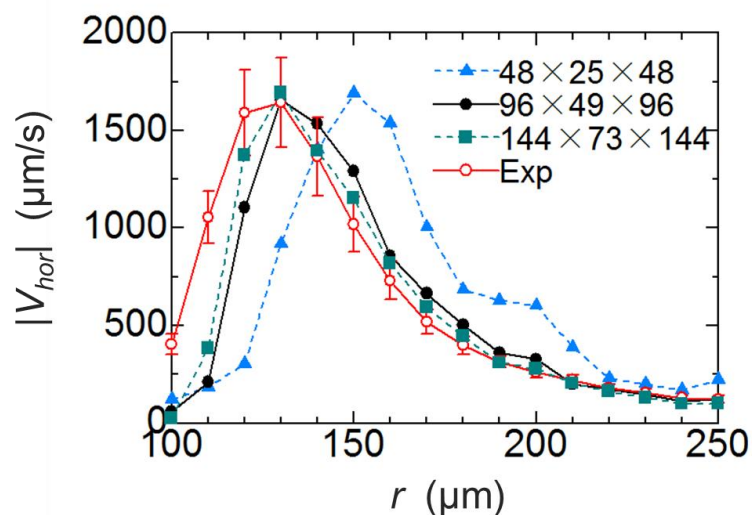

Figure S1. Comparison with the radial profile of  $|V_{hor}|$  calculated with different grid resolutions in the numerical simulation. The distribution calculated with a low-resolution grid ( $48 \times 25 \times 48$ ) differ significantly, but those calculated with medium ( $96 \times 49 \times 96$ ; used in the main results) and high-resolutions ( $144 \times 73 \times 144$ ) were similar.

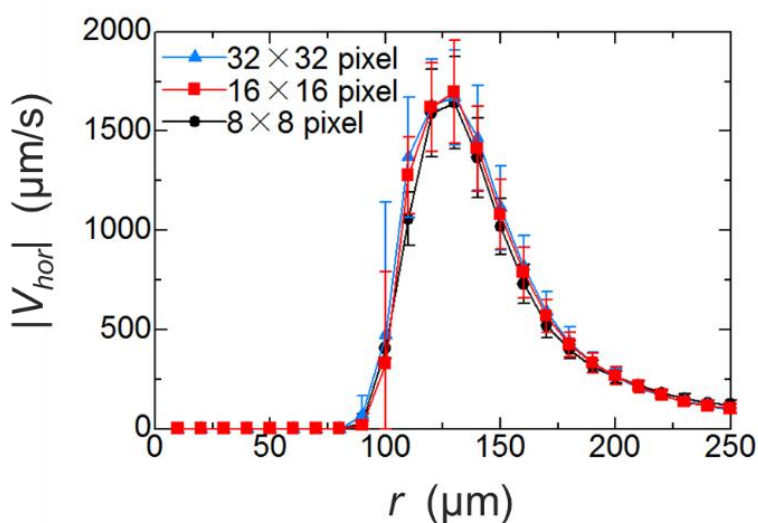

Figure S2. Comparison of the radial profile of  $|V_{hor}|$  calculated with different window size in PIV analysis. One pixel in images corresponds to  $0.8 \mu\text{m}$ .

Supporting Movie S1: Animation of the velocity field ( $u_1, u_3$ ) at  $y = 50 \mu\text{m}$  obtained from the numerical simulation.

Supporting Movie S2: Motion of a tracer particle depicted in Figure 13 (a) in the main text.

Supporting Movie S3: Motion of a tracer particle depicted in Figure 13 (b) in the main text.
