# Supplementary material for: Numerical and Experimental Analyses of Three-Dimensional Unsteady Flow Around a Micro-Pillar Subjected to Rotational Vibration
Source: Preprints.org preprint supplement (doi:10.20944/preprints201811.0175.v1), 2018-11-07
Supplement: Supplementary file 2 [file supplementary]

Archive with 4 entries (4 files):
- Supporting Information_kaneko.pdf
- Movie S1.avi
- Movie S2.avi
- Movie S3.avi
